# Supplementary material
Source: Elsevier journal article supplement (http://www.sonel.ru/common/files/sertification/mmc1.pdf)

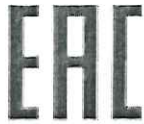

# ЕВРАЗИЙСКИЙ ЭКОНОМИЧЕСКИЙ СОЮЗ ДЕКЛАРАЦИЯ О СООТВЕТСТВИИ

**Заявитель:** Общество с ограниченной ответственностью «СОНЭЛ».

Основной государственный регистрационный номер: 1027723006960.

Место нахождения (адрес юридического лица): 142713, Россия, область Московская, Ленинский район, деревня Григорчиково, улица Майская, дом 12; адрес (адреса) места осуществления деятельности: 142714, Россия, Московская область, Ленинский район, сельское поселение Молоковское, деревня Мисайлово, улица Первомайская, дом 158А; номер телефона: +7(495)287-43-53; адрес электронной почты: info@sonel.ru

**в лице** Генерального директора Ништы Владимира Викторовича

**заявляет, что** Оборудование низковольтное: меры сопротивлений петли короткого замыкания многозначные ММС-1, ММС-01. Продукция изготовлена в соответствии с техническими условиями СНБА.411640.001ТУ «Меры сопротивлений петли короткого замыкания многозначные ММС-1, ММС-01».

**изготовитель:** Общество с ограниченной ответственностью «СОНЭЛ».

Место нахождения (адрес юридического лица): 142713, Россия, область Московская, Ленинский район, деревня Григорчиково, улица Майская, дом 12; адрес (адреса) места осуществления деятельности по изготовлению продукции: 142714, Россия, Московская область, Ленинский район, сельское поселение Молоковское, деревня Мисайлово, улица Первомайская, дом 158А.

Код ТН ВЭД ЕАЭС: 9030 33 990 0

Серийный выпуск.

**соответствует требованиям**

Технических регламентов Таможенного союза ТР ТС 004/2011 «О безопасности низковольтного оборудования», ТР ТС 020/2011 «Электромагнитная совместимость технических средств»

**Декларация о соответствии принята на основании**

Протокола испытаний № 034.19-1 от 10.06.2019 Испытательной лаборатории Общества с ограниченной ответственностью «ЕВРОКОНС», аттестат аккредитации № RA.RU.21HA40; руководства по эксплуатации, технических условий СНБА.411640.001ТУ.

Схема декларирования - Зд.

**Дополнительная информация**

Стандарты, в результате применения которых на добровольной основе обеспечивается соблюдение требований технического регламента: ГОСТ ИЕС 61010-2-030-2013 «Безопасность электрических контрольно-измерительных приборов и лабораторного оборудования. Часть 2-030. Частные требования к испытательным и измерительным цепям», ГОСТ Р 51522.1-2011 (МЭК 61326-1:2005) «Совместимость технических средств электромагнитная. Электрическое оборудование для измерения, управления и лабораторного применения. Часть 1. Общие требования и методы испытаний». Условия хранения продукции в соответствии с ГОСТ 15150-69. Срок хранения - 5 лет. Срок службы – 15 лет.

**Декларация о соответствии действительна с даты регистрации по 20.11.2024 включительно.**

(подпись)

Ништа Владимир Викторович

(Ф.И.О. заявителя)

Регистрационный номер декларации о соответствии: ЕАЭС № RU Д- RU. AM02.B.00638/19

Дата регистрации декларации о соответствии: 21.11.2019

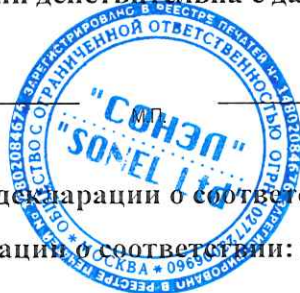

Supplement: mmc1 [file mmc1.pdf]
